# Supplementary material for: Identification and Characterization of a Novel Endo-β-1,4-Xylanase from Streptomyces sp. T7 and Its Application in Xylo-Oligosaccharide Production
Source: MDPI journal article supplement (doi:10.3390/molecules27082516), 2022-04-13
Supplement: s1 [file s1]

Identification and Characterization of a Novel Endo- $\beta$ -1,4-Xylanase from *Streptomyces* sp. T7  
and its Application in Xylo-oligosaccharide Production

School of Biological Science and Biotechnology, University of Jinan, China

\*Corresponding author. Tel: +86 531 82766825; fax: +86 531 82765807

E-mail: bio\_huangzs@ujn.edu.cn

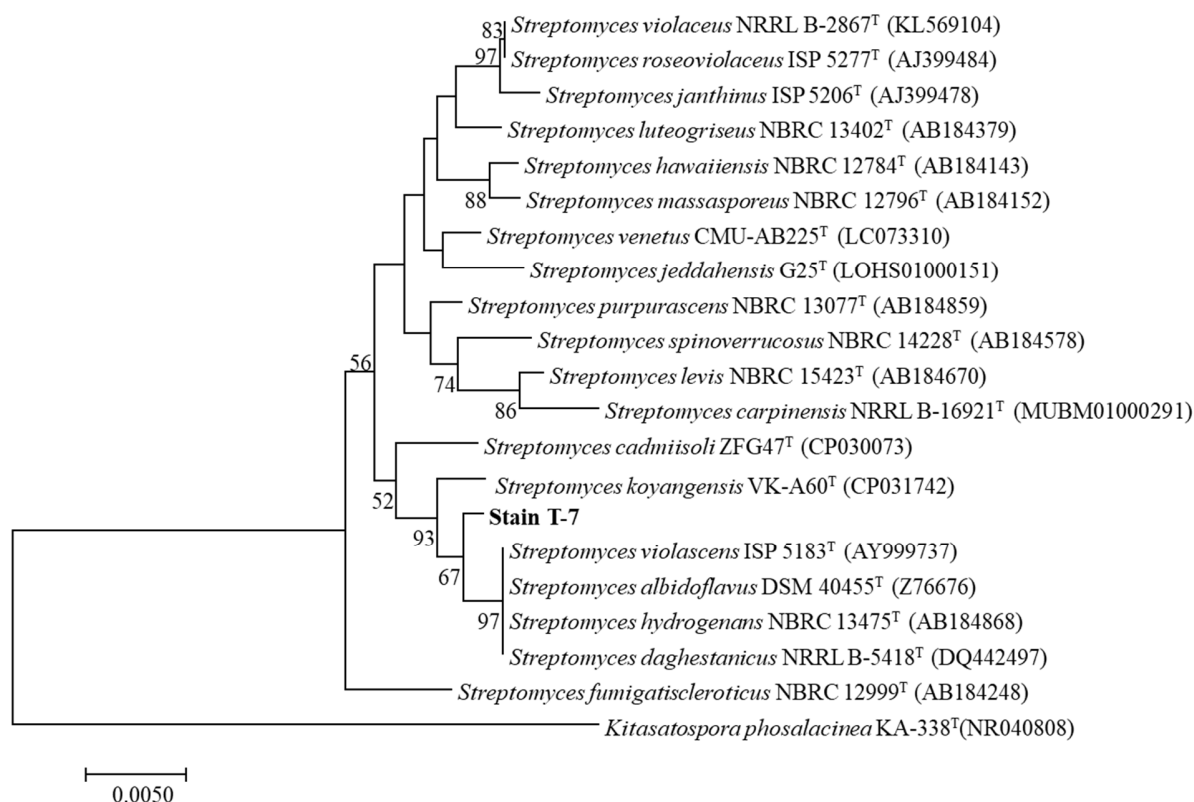

**Figure S1.** Neighbour-joining phylogenetic tree based on 16S rRNA gene sequences showing the position of strain T7 among its phylogenetic neighbours. *Kitasatospora phosalacinea* KA-338<sup>T</sup> was used as outgroup. Bootstrap values (>50 %) based on 1000 replications are shown at branch nodes. Bar, 0.005 substitutions per nucleotide position.

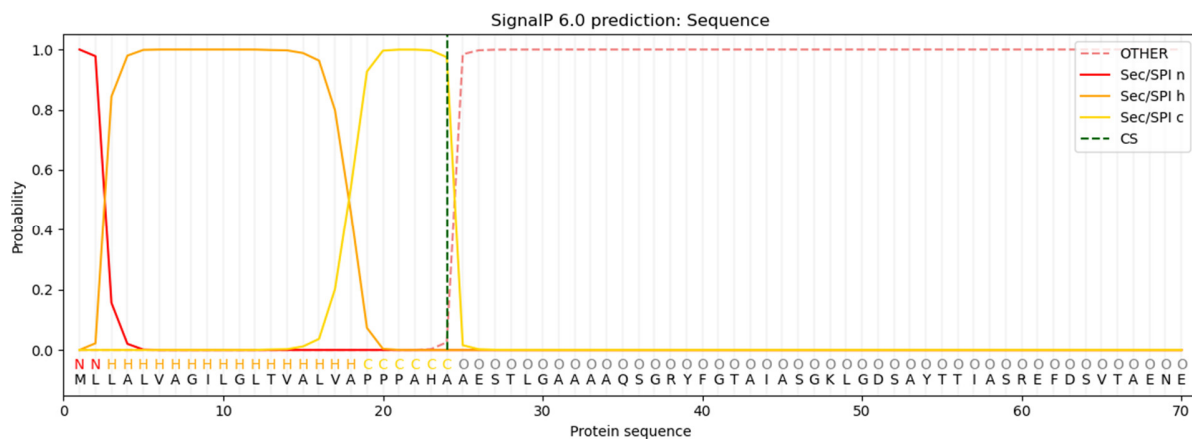

**Figure S2.** Predictive signal peptide sequence of xynST7

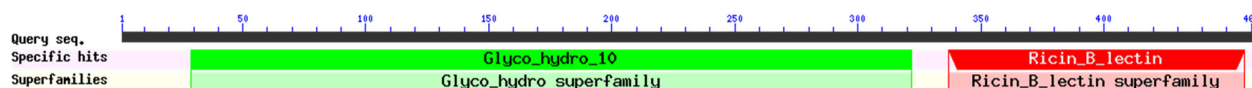

**Figure S3.** Conserved domains of xynST7

**Amino acid composition:**

|         |    |       |
|---------|----|-------|
| Ala (A) | 46 | 10.6% |
| Arg (R) | 22 | 5.1%  |
| Asn (N) | 25 | 5.7%  |
| Asp (D) | 30 | 6.9%  |
| Cys (C) | 10 | 2.3%  |
| Gln (Q) | 26 | 6.0%  |
| Glu (E) | 9  | 2.1%  |
| Gly (G) | 52 | 12.0% |
| His (H) | 5  | 1.1%  |
| Ile (I) | 14 | 3.2%  |
| Leu (L) | 26 | 6.0%  |
| Lys (K) | 14 | 3.2%  |
| Met (M) | 6  | 1.4%  |
| Phe (F) | 12 | 2.8%  |
| Pro (P) | 12 | 2.8%  |
| Ser (S) | 36 | 8.3%  |
| Thr (T) | 35 | 8.0%  |
| Trp (W) | 14 | 3.2%  |
| Tyr (Y) | 14 | 3.2%  |
| Val (V) | 27 | 6.2%  |
| Pyl (O) | 0  | 0.0%  |
| Sec (U) | 0  | 0.0%  |

**Figure S4.** Total amino acid composition (%) of xynST7. Total numbers of negatively (Asp + Glu) and positively (Arg + Lys) charged residues were 39 and 36, respectively.

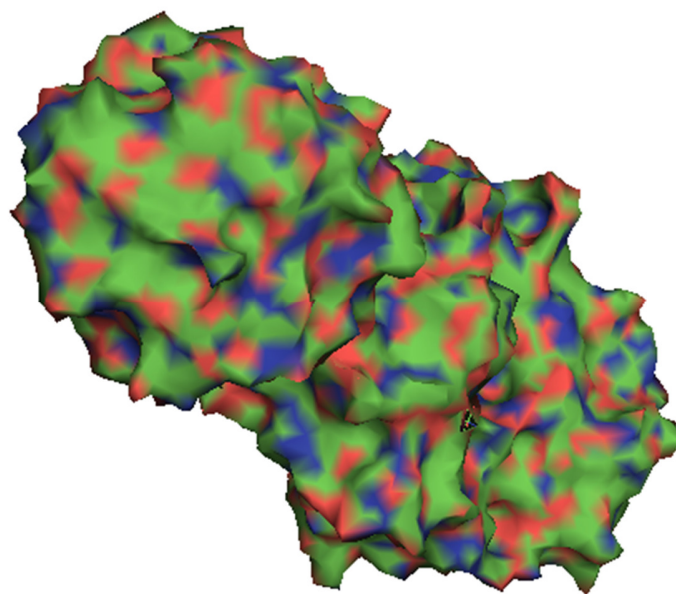

**Figure S5.** Surface representation of xynST7. Negatively and positively charged surfaces are coloured red and blue, respectively.
